# Supplementary material
Source: PubMed Central journal article supplement (PMC2851905)
Supplement: 1001681107_pnas.1001681107_SI.pdf [file 1001681107_pnas.1001681107_SI.pdf]

# Supporting Information

Neumann et al. 10.1073/pnas.1001681107

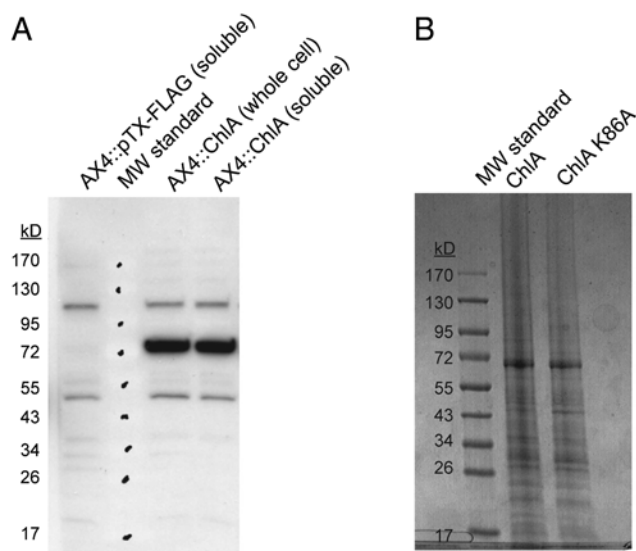

**Fig. S1.** Analysis of protein expression and purification. (A) Western blot analysis showing expression of ChIA protein and recovery in the soluble fraction of the cell lysate. Proteins were blotted with an  $\alpha$ -myc antibody with HRP conjugate and detected with ECL Plus reagent (Amersham). (B) SDS-PAGE analysis of ChIA and ChIA K86A proteins after affinity purification with an  $\alpha$ -FLAG agarose resin. (Molecular weight standards are approximate due to lot-specific variation in the pre-stained standards.)

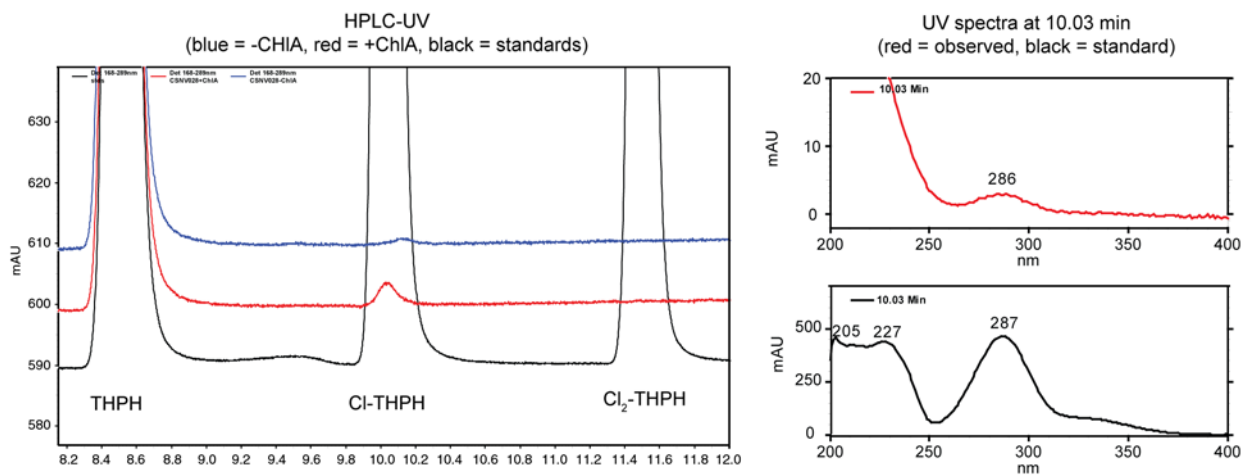

**Fig. S2.** HPLC-UV analysis of in vitro THPH halogenation reactions containing purified ChIA (red) or lacking ChIA (blue). A peak coeluting with authentic Cl-THPH showed  $\lambda_{\text{max}} = 286$  nm (standard  $\lambda_{\text{max}} = 287$  nm). Spectral differences below 250 nm are attributable to the organic phase of HPLC eluent.
